# Supplementary material
Source: PubMed Central journal article supplement (PMC4438938)
Supplement: tx5b00004_si_001.pdf [file tx5b00004_si_001.pdf]

## Supporting Information for

### Highly predictive reprogramming of tRNA modifications is linked to selective expression of codon-biased genes

Clement T. Y. Chan, Wenjun Deng, Fugen Li, Michael S. DeMott, I. Ramesh Babu, Thomas J. Begley and Peter C. Dedon

#### Contents

**Figure S1:** Cytotoxicity dose-response curves. *S. cerevisiae* cultures were exposed to H<sub>2</sub>O<sub>2</sub>, TBHP, ONOO<sup>-</sup>,  $\gamma$ -Rad, MMS, EMS, IMS, MNNG, and NMU, and cell survival quantified by a colony-forming assay

**Figure S2.** Hierarchical clustering analysis of stress-induced changes in tRNA modification levels

**Figure S3.** Loss of Trm140 confers sensitivity to the five alkylating agents

**Figure S4:** An analysis of statistically significant use of ACC and ACT codons in genes in Gene Ontology categories reveals highly significant enrichment of translation functions in genes up-regulated by MMS and in intermediary metabolism categories in genes down-regulated by MMS

**Table S1.** Toxicant-induced changes in tRNA modifications

**Table S2.** Average fold-change values for toxicant-induced changes in tRNA modifications

**Table S3:** MMS treatment induces up- or down-regulation of 694 of 2381 proteins independent of changes in mRNA levels – *provided as a separate Excel file.*

**Table S4:** Proteins with threonine content >10% are membrane- and cell wall-related proteins

#### Supporting References

**Figure S1:** Cytotoxicity dose-response curves. *S. cerevisiae* cultures were exposed to H<sub>2</sub>O<sub>2</sub>, TBHP, ONOO<sup>-</sup>,  $\gamma$ -Rad, MMS, EMS, IMS, MNNG, and NMU, and cell survival quantified by a colony-forming assay. Data represents mean  $\pm$  SD for three biological replicates. Doses producing 80% lethality (LD<sub>80</sub>) were chosen for studying stress-induced changes in tRNA modification patterns.

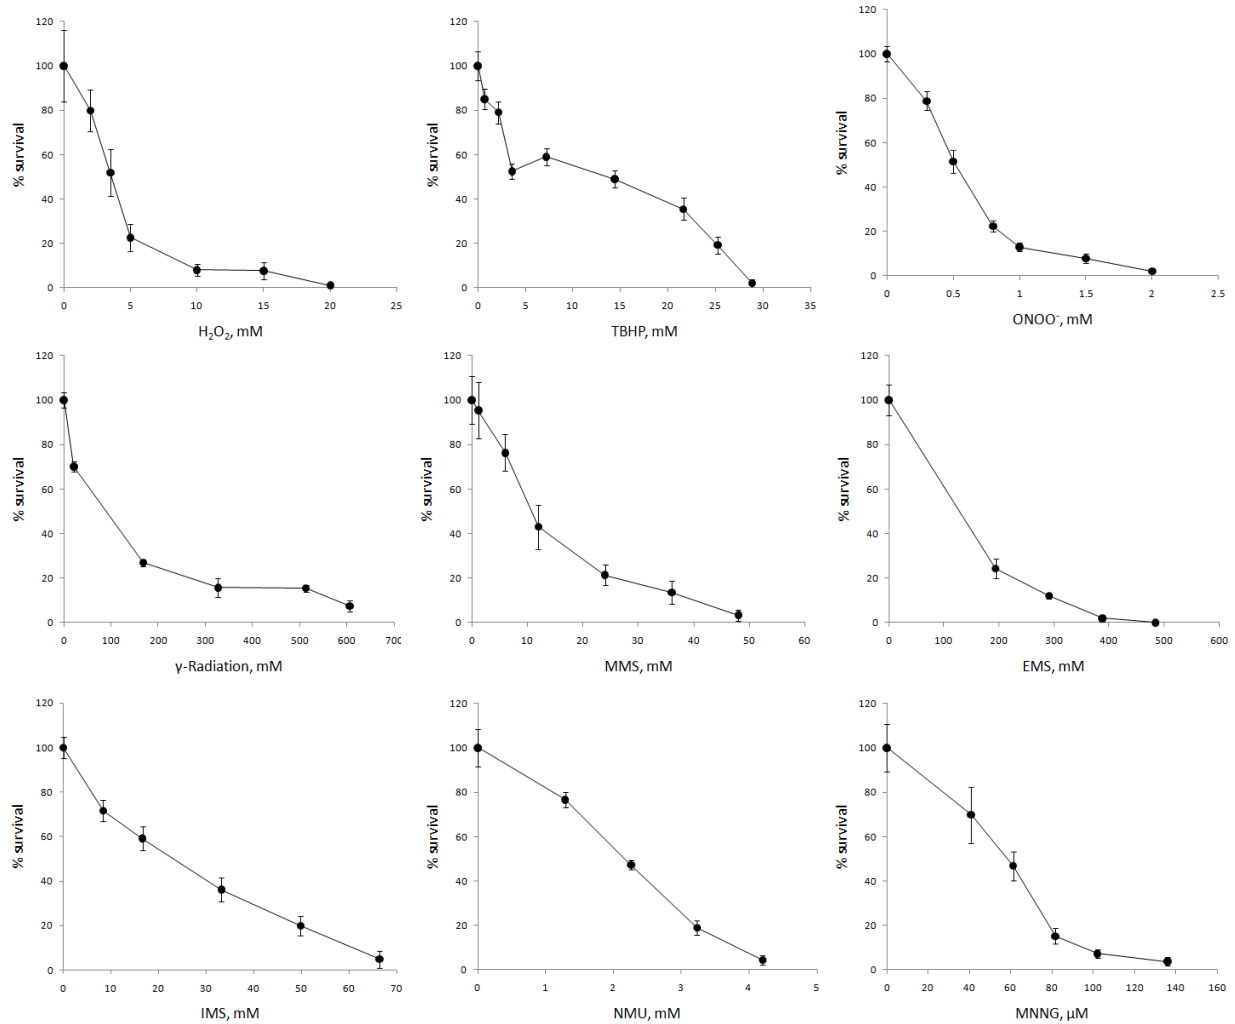

**Figure S2.** Hierarchical clustering analysis of stress-induced changes in tRNA modification levels. The fold-change values from **Table S1** for tRNA modifications (rows) from cells exposed to LD<sub>80</sub> doses of the 9 toxicants (columns) were analyzed by hierarchical clustering using the centroid linkage algorithm in Cluster 3.0 following log<sub>2</sub>-transformation of the fold-change data and the heat map representation was produced using Java Treeview, as described elsewhere.<sup>1</sup> The three boxes below the heat map define color-coding used to identify the three treatment conditions: unexposed control, alkylating agent and oxidizing agent.

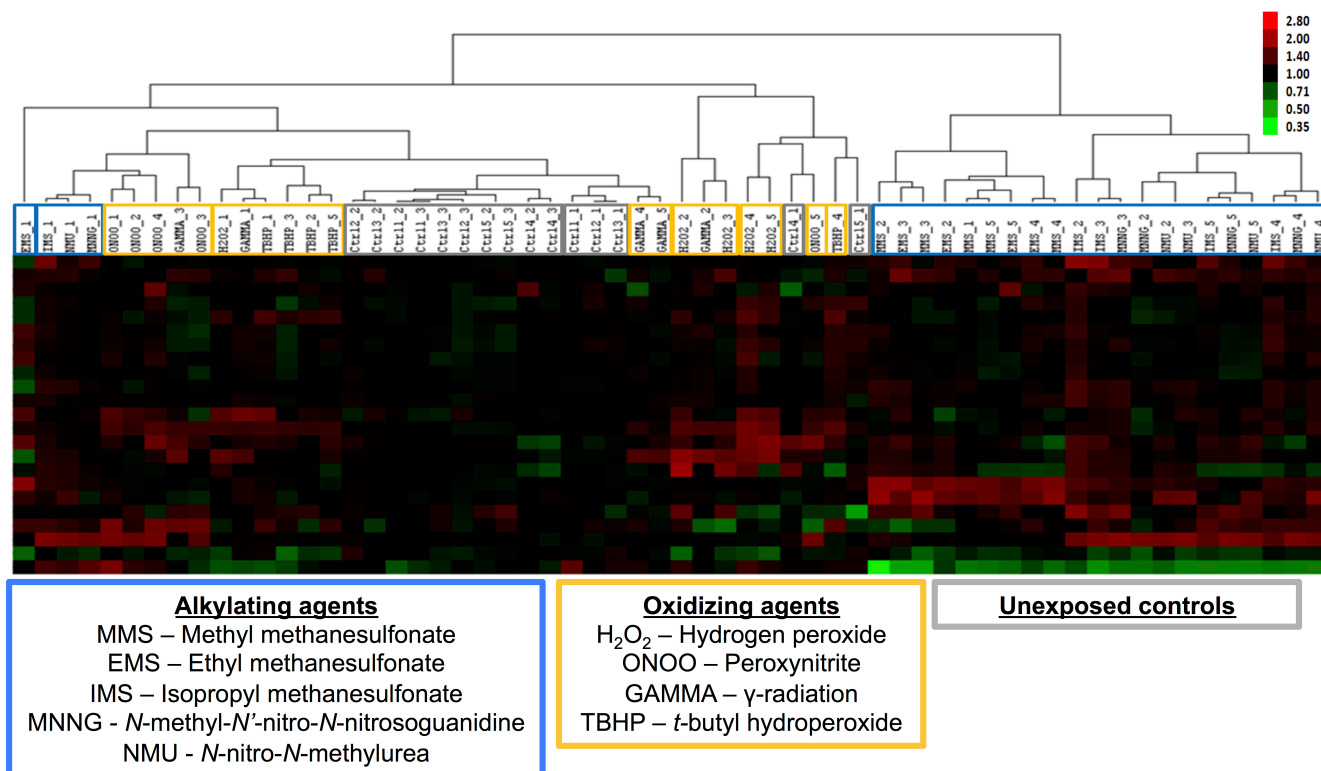

**Figure S3.** Loss of Trm140 confers sensitivity to the  $S_N^2$  alkylating agents, MMS and EMS. Cultures of wild-type and  $\Delta trm140$  mutant *S. cerevisiae* were exposed to an LD<sub>80</sub> dose of an alkylating agent determined for wild-type cells and cell survival was quantified by a colony-forming assay. Data represent mean  $\pm$ SD for three biological replicates, with differences between wild-type and mutant cells determined by Student's t-test.

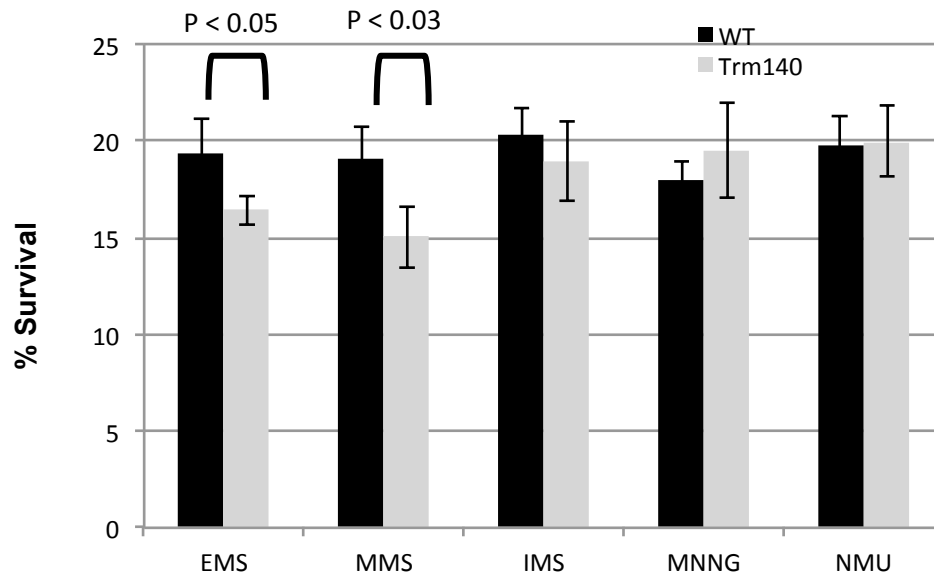

**Figure S4:** An analysis of statistically significant use of ACC and ACT codons in genes in Gene Ontology categories reveals highly significant enrichment of translation functions in genes up-regulated by MMS and in intermediary metabolism categories in genes down-regulated by MMS.

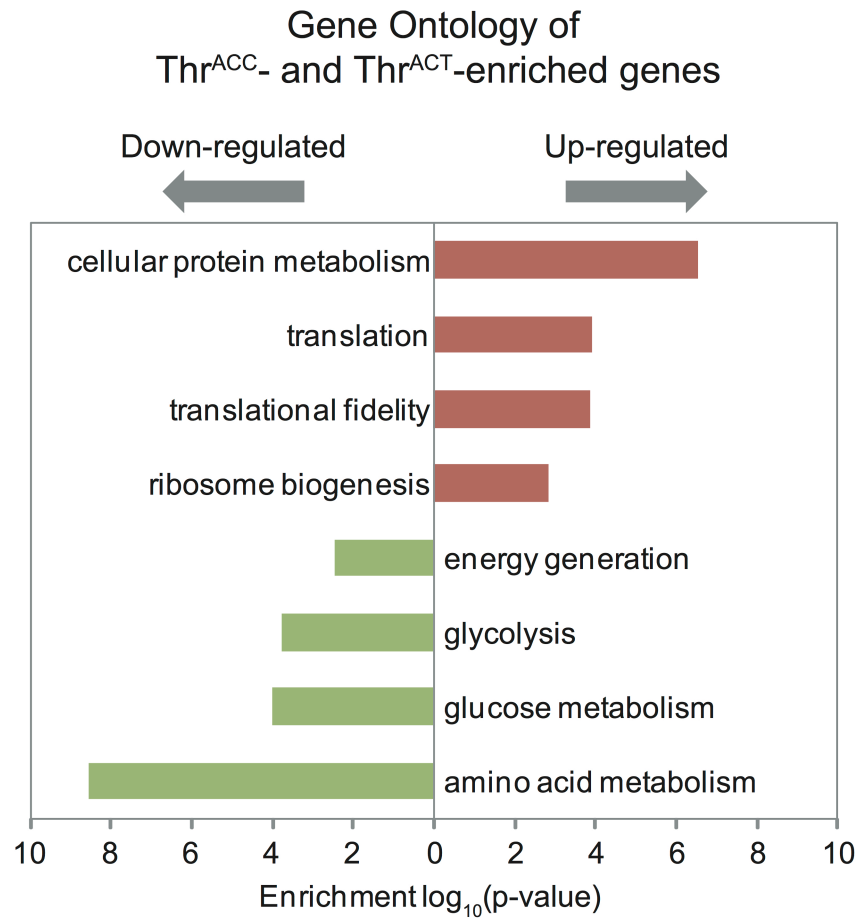

**Table S1.** Toxicant-induced changes in tRNA modifications. Data represent fold-change values for 5 biological replicates of yeast exposed to LD<sub>80</sub> doses of 9 toxicants (1 h, 37 °C). Each of the 5 datasets is derived from exposure to 9 different toxicants and 3 unexposed controls. Fold-change data were calculated by dividing the MS signal intensity for each ribonucleoside in each exposure sample by the average MS signal intensity for the 3 unexposed controls.

| Set 1                             |          |          |          |       |         |                                 |       |       |        |       |        |        |
|-----------------------------------|----------|----------|----------|-------|---------|---------------------------------|-------|-------|--------|-------|--------|--------|
| Ribonucleoside                    | Ctrl 1-1 | Ctrl 1-2 | Ctrl 1-3 | EMS 1 | γ-Rad 1 | H <sub>2</sub> O <sub>2</sub> 1 | IMS 1 | MMS 1 | MNNG 1 | NMU 1 | ONOO 1 | TBHP 1 |
| D                                 | 1.023    | 1.003    | 0.973    | 1.298 | 1.098   | 1.048                           | 1.103 | 0.996 | 1.030  | 1.071 | 1.073  | 1.092  |
| Y                                 | 1.011    | 1.001    | 0.988    | 1.225 | 1.092   | 1.035                           | 1.079 | 0.972 | 1.024  | 1.054 | 1.085  | 1.082  |
| ncm <sup>5</sup> U                | 1.034    | 1.055    | 0.911    | 1.354 | 1.557   | 1.412                           | 1.018 | 0.927 | 1.075  | 0.987 | 1.365  | 1.481  |
| I                                 | 1.042    | 0.942    | 1.015    | 0.842 | 1.018   | 0.965                           | 1.091 | 0.985 | 1.012  | 1.074 | 1.002  | 1.022  |
| m <sup>5</sup> U                  | 1.054    | 0.959    | 0.988    | 1.158 | 1.043   | 1.007                           | 1.078 | 0.989 | 1.029  | 1.028 | 1.040  | 1.032  |
| Gm                                | 0.964    | 1.000    | 1.036    | 0.803 | 1.031   | 1.009                           | 1.556 | 1.136 | 1.285  | 1.120 | 1.026  | 1.055  |
| Um                                | 1.012    | 0.977    | 1.011    | 1.278 | 1.025   | 0.891                           | 1.262 | 0.977 | 1.104  | 1.188 | 1.604  | 1.257  |
| m <sup>5</sup> C                  | 1.034    | 0.971    | 0.995    | 1.112 | 1.243   | 1.282                           | 1.094 | 1.021 | 1.045  | 1.055 | 1.313  | 1.294  |
| m <sup>3</sup> C                  | 1.019    | 1.004    | 0.976    | 1.703 | 1.105   | 1.043                           | 1.190 | 1.515 | 1.088  | 1.157 | 1.074  | 1.083  |
| Cm                                | 1.028    | 0.950    | 1.022    | 0.828 | 1.048   | 1.207                           | 1.099 | 0.993 | 0.996  | 1.063 | 1.073  | 1.319  |
| mcm <sup>5</sup> U                | 1.026    | 0.968    | 1.006    | 1.125 | 1.068   | 1.083                           | 1.158 | 1.052 | 1.074  | 1.164 | 1.043  | 1.128  |
| m <sup>1</sup> G                  | 0.974    | 1.008    | 1.018    | 0.853 | 1.059   | 1.020                           | 1.095 | 1.074 | 0.969  | 1.040 | 1.041  | 1.075  |
| m <sup>2</sup> G                  | 0.962    | 0.992    | 1.046    | 0.718 | 1.035   | 1.012                           | 1.183 | 1.098 | 1.074  | 1.159 | 0.994  | 1.044  |
| ac <sup>4</sup> C                 | 1.022    | 0.991    | 0.988    | 1.312 | 1.085   | 1.024                           | 1.061 | 0.956 | 0.973  | 0.969 | 1.113  | 1.086  |
| t <sup>6</sup> A                  | 0.970    | 1.016    | 1.014    | 0.929 | 1.044   | 1.171                           | 1.164 | 1.056 | 1.075  | 1.138 | 1.000  | 1.064  |
| mcm <sup>5</sup> s <sup>2</sup> U | 1.008    | 1.005    | 0.987    | 1.053 | 1.045   | 1.043                           | 1.054 | 1.031 | 1.051  | 1.043 | 1.014  | 1.094  |
| m <sup>7</sup> G                  | 1.065    | 0.985    | 0.949    | 1.214 | 1.105   | 1.034                           | 1.098 | 1.433 | 0.900  | 1.289 | 1.106  | 1.087  |
| m <sup>1</sup> I                  | 0.958    | 1.003    | 1.039    | 0.670 | 1.065   | 0.791                           | 0.988 | 0.902 | 0.838  | 0.882 | 1.027  | 1.075  |
| Am                                | 1.008    | 0.991    | 1.001    | 0.989 | 1.063   | 0.972                           | 1.666 | 0.982 | 1.526  | 1.604 | 1.619  | 1.065  |
| m <sub>2</sub> G                  | 0.961    | 1.003    | 1.035    | 0.708 | 1.349   | 1.440                           | 1.159 | 1.005 | 1.047  | 1.126 | 0.997  | 1.042  |
| i6A                               | 1.044    | 0.991    | 0.966    | 1.429 | 1.125   | 1.059                           | 1.122 | 1.012 | 1.010  | 1.053 | 1.130  | 1.145  |
| yW                                | 1.456    | 0.712    | 0.832    | 1.005 | 0.743   | 0.715                           | 1.313 | 0.612 | 1.429  | 1.244 | 1.624  | 0.720  |
| m <sup>1</sup> A                  | 1.013    | 1.007    | 0.979    | 1.106 | 1.086   | 1.046                           | 1.103 | 1.002 | 0.998  | 1.072 | 1.071  | 1.082  |

| Set 2              |          |          |          |       |         |                                 |       |       |        |       |        |        |
|--------------------|----------|----------|----------|-------|---------|---------------------------------|-------|-------|--------|-------|--------|--------|
| Ribonucleoside     | Ctrl 2-1 | Ctrl 2-2 | Ctrl 2-3 | EMS 2 | γ-Rad 2 | H <sub>2</sub> O <sub>2</sub> 2 | IMS 2 | MMS 2 | MNNG 2 | NMU 2 | ONOO 2 | TBHP 2 |
| D                  | 1.016    | 1.065    | 0.918    | 1.065 | 1.128   | 1.093                           | 1.249 | 1.131 | 1.023  | 1.031 | 1.016  | 1.011  |
| Y                  | 1.098    | 1.006    | 0.895    | 0.941 | 1.074   | 1.082                           | 1.133 | 1.083 | 0.953  | 0.953 | 1.063  | 0.987  |
| ncm <sup>5</sup> U | 0.982    | 0.897    | 1.121    | 0.765 | 1.071   | 1.274                           | 0.990 | 0.949 | 0.836  | 1.057 | 1.250  | 1.112  |
| I                  | 1.111    | 0.972    | 0.917    | 0.994 | 1.034   | 1.002                           | 1.186 | 1.052 | 0.899  | 0.947 | 1.006  | 0.932  |
| m <sup>5</sup> U   | 1.089    | 0.997    | 0.914    | 1.049 | 1.129   | 1.072                           | 1.241 | 1.097 | 0.995  | 1.041 | 1.052  | 1.099  |
| Gm                 | 0.945    | 1.063    | 0.992    | 1.184 | 1.037   | 1.062                           | 1.768 | 1.149 | 1.250  | 1.029 | 0.922  | 0.981  |
| Um                 | 1.089    | 0.988    | 0.924    | 0.814 | 0.704   | 1.129                           | 0.985 | 0.823 | 0.868  | 0.997 | 1.142  | 0.834  |
| m <sup>5</sup> C   | 1.029    | 1.033    | 0.937    | 0.933 | 1.319   | 1.366                           | 1.121 | 0.958 | 0.870  | 0.942 | 1.226  | 1.224  |
| m <sup>3</sup> C   | 0.993    | 1.052    | 0.954    | 1.608 | 1.028   | 1.056                           | 1.375 | 1.763 | 1.141  | 1.194 | 0.962  | 1.015  |
| Cm                 | 1.052    | 1.028    | 0.920    | 0.915 | 1.015   | 1.218                           | 1.182 | 1.027 | 0.850  | 0.894 | 0.910  | 1.227  |
| mcm <sup>5</sup> U | 0.969    | 1.051    | 0.979    | 1.207 | 1.113   | 1.043                           | 0.986 | 1.103 | 0.973  | 1.320 | 0.985  | 0.960  |
| m <sup>1</sup> G   | 0.971    | 1.079    | 0.950    | 1.045 | 1.084   | 1.067                           | 1.206 | 1.092 | 0.958  | 0.995 | 0.972  | 1.014  |
| m <sup>2</sup> G   | 0.960    | 1.063    | 0.977    | 1.081 | 1.085   | 1.070                           | 1.347 | 1.211 | 1.063  | 1.107 | 0.914  | 1.017  |

|                                   |       |       |       |       |       |       |       |       |       |       |       |       |
|-----------------------------------|-------|-------|-------|-------|-------|-------|-------|-------|-------|-------|-------|-------|
| ac <sup>4</sup> C                 | 1.013 | 1.050 | 0.936 | 1.000 | 1.068 | 1.040 | 1.160 | 1.059 | 0.929 | 0.988 | 0.984 | 0.979 |
| t <sup>6</sup> A                  | 0.996 | 1.036 | 0.968 | 1.132 | 1.040 | 1.910 | 1.296 | 1.215 | 1.001 | 1.129 | 0.955 | 1.031 |
| mcm <sup>5</sup> s <sup>2</sup> U | 0.986 | 1.079 | 0.935 | 1.102 | 1.005 | 1.448 | 1.701 | 1.259 | 0.946 | 1.053 | 1.175 | 1.166 |
| m <sup>7</sup> G                  | 1.004 | 1.050 | 0.946 | 1.487 | 1.073 | 1.076 | 1.285 | 1.802 | 0.999 | 1.461 | 0.979 | 1.021 |
| m <sup>1</sup> I                  | 0.958 | 1.151 | 0.891 | 0.787 | 0.988 | 0.676 | 0.949 | 1.022 | 0.717 | 0.934 | 0.916 | 0.827 |
| Am                                | 0.934 | 1.076 | 0.990 | 1.056 | 1.045 | 1.036 | 1.526 | 1.157 | 1.618 | 1.611 | 1.530 | 0.980 |
| m <sup>2</sup> <sub>2</sub> G     | 0.960 | 1.052 | 0.988 | 1.114 | 1.581 | 1.757 | 1.294 | 1.157 | 1.044 | 1.085 | 0.948 | 1.035 |
| i6A                               | 0.914 | 1.104 | 0.982 | 1.157 | 1.067 | 1.250 | 1.349 | 1.151 | 1.036 | 1.155 | 1.008 | 1.029 |
| yW                                | 1.037 | 0.988 | 0.975 | 0.802 | 1.026 | 1.170 | 0.738 | 0.378 | 0.627 | 0.674 | 1.214 | 0.929 |
| m <sup>1</sup> A                  | 0.984 | 1.084 | 0.931 | 1.084 | 1.096 | 1.092 | 1.318 | 1.163 | 1.010 | 1.070 | 0.986 | 1.022 |

| Set 3                             |          |          |          |       |         |                                 |       |       |        |       |        |        |
|-----------------------------------|----------|----------|----------|-------|---------|---------------------------------|-------|-------|--------|-------|--------|--------|
| Ribonucleosides                   | Ctrl 3-1 | Ctrl 3-2 | Ctrl 3-3 | EMS 3 | γ-Rad 3 | H <sub>2</sub> O <sub>2</sub> 3 | IMS 3 | MMS 3 | MNNG 3 | NMU 3 | ONOO 3 | TBHP 3 |
| D                                 | 1.069    | 0.975    | 0.956    | 1.026 | 0.898   | 0.963                           | 1.084 | 0.998 | 1.072  | 1.040 | 0.841  | 0.875  |
| Y                                 | 1.084    | 0.943    | 0.974    | 1.044 | 0.892   | 0.930                           | 1.069 | 0.976 | 1.134  | 1.012 | 0.888  | 0.880  |
| ncm <sup>5</sup> U                | 0.982    | 1.112    | 0.905    | 1.165 | 1.086   | 0.951                           | 1.095 | 1.014 | 1.118  | 1.138 | 0.817  | 1.035  |
| I                                 | 1.062    | 0.940    | 0.998    | 0.989 | 0.877   | 0.971                           | 0.996 | 0.925 | 1.034  | 0.941 | 0.885  | 0.802  |
| m <sup>5</sup> U                  | 0.989    | 1.015    | 0.996    | 1.007 | 0.935   | 0.976                           | 1.154 | 1.058 | 1.125  | 0.999 | 0.994  | 0.994  |
| Gm                                | 0.965    | 1.043    | 0.991    | 1.268 | 0.991   | 0.994                           | 1.681 | 0.950 | 1.307  | 1.039 | 0.955  | 0.960  |
| Um                                | 1.085    | 0.816    | 1.100    | 0.675 | 1.494   | 0.642                           | 1.288 | 0.812 | 1.110  | 1.114 | 1.524  | 1.097  |
| m <sup>5</sup> C                  | 0.982    | 1.029    | 0.989    | 1.069 | 1.257   | 1.310                           | 1.095 | 1.064 | 1.122  | 1.038 | 1.268  | 1.229  |
| m <sup>3</sup> C                  | 0.962    | 1.041    | 0.997    | 1.752 | 0.970   | 0.984                           | 1.300 | 1.493 | 1.218  | 1.142 | 0.948  | 0.963  |
| Cm                                | 1.011    | 0.986    | 1.003    | 0.967 | 0.933   | 1.103                           | 1.009 | 0.923 | 0.992  | 0.944 | 0.883  | 1.138  |
| mcm <sup>5</sup> U                | 0.798    | 1.164    | 1.038    | 1.529 | 1.211   | 1.348                           | 1.408 | 1.284 | 1.480  | 1.241 | 1.188  | 1.247  |
| m <sup>1</sup> G                  | 1.000    | 1.028    | 0.972    | 0.988 | 0.957   | 0.952                           | 1.033 | 0.962 | 1.045  | 0.972 | 0.874  | 0.908  |
| m <sup>2</sup> G                  | 1.001    | 1.011    | 0.988    | 1.179 | 0.992   | 0.991                           | 1.176 | 1.064 | 1.209  | 1.141 | 0.961  | 0.974  |
| ac <sup>4</sup> C                 | 1.069    | 1.025    | 0.906    | 1.066 | 0.961   | 0.946                           | 1.071 | 0.970 | 1.043  | 1.016 | 1.016  | 0.888  |
| t <sup>6</sup> A                  | 0.956    | 1.029    | 1.015    | 1.180 | 0.998   | 1.586                           | 1.165 | 1.115 | 1.164  | 1.113 | 1.022  | 0.990  |
| mcm <sup>5</sup> s <sup>2</sup> U | 0.840    | 1.059    | 1.100    | 1.267 | 1.209   | 1.341                           | 1.392 | 1.462 | 1.550  | 1.065 | 1.249  | 1.155  |
| m <sup>7</sup> G                  | 1.006    | 1.011    | 0.983    | 1.454 | 0.909   | 0.940                           | 1.116 | 1.812 | 1.190  | 1.505 | 0.872  | 0.893  |
| m <sup>1</sup> I                  | 1.103    | 0.972    | 0.925    | 0.885 | 0.861   | 0.813                           | 0.764 | 0.679 | 0.852  | 0.777 | 0.879  | 0.669  |
| Am                                | 0.992    | 1.025    | 0.983    | 1.103 | 0.995   | 0.991                           | 1.640 | 1.005 | 1.725  | 1.663 | 1.396  | 0.956  |
| m <sup>2</sup> <sub>2</sub> G     | 0.976    | 1.044    | 0.980    | 1.143 | 1.445   | 1.449                           | 1.168 | 1.061 | 1.162  | 1.066 | 0.987  | 0.991  |
| i6A                               | 0.957    | 1.061    | 0.981    | 1.258 | 1.339   | 1.181                           | 1.291 | 1.091 | 1.092  | 1.042 | 1.172  | 1.117  |
| yW                                | 1.103    | 1.002    | 0.894    | 0.506 | 0.977   | 0.912                           | 0.558 | 0.512 | 0.631  | 0.588 | 0.829  | 0.772  |
| m <sup>1</sup> A                  | 0.999    | 1.035    | 0.967    | 1.113 | 1.003   | 0.995                           | 1.140 | 1.051 | 1.217  | 1.092 | 0.997  | 0.950  |

| Set 4              |          |          |          |       |         |                                 |       |       |        |       |        |        |
|--------------------|----------|----------|----------|-------|---------|---------------------------------|-------|-------|--------|-------|--------|--------|
| Ribonucleosides    | Ctrl 4-1 | Ctrl 4-2 | Ctrl 4-3 | EMS 4 | γ-Rad 4 | H <sub>2</sub> O <sub>2</sub> 4 | IMS 4 | MMS 4 | MNNG 4 | NMU 4 | ONOO 4 | TBHP 4 |
| D                  | 0.976    | 1.011    | 1.013    | 1.092 | 1.038   | 1.176                           | 1.230 | 1.104 | 1.074  | 1.095 | 1.056  | 1.165  |
| Y                  | 0.973    | 1.016    | 1.011    | 1.117 | 1.033   | 1.273                           | 1.259 | 1.063 | 1.097  | 1.084 | 1.089  | 1.166  |
| ncm <sup>5</sup> U | 1.050    | 0.995    | 0.954    | 1.032 | 1.042   | 1.440                           | 1.100 | 0.898 | 0.939  | 1.128 | 1.187  | 1.198  |
| I                  | 0.995    | 1.055    | 0.950    | 1.176 | 1.098   | 1.267                           | 1.197 | 1.085 | 1.051  | 1.187 | 1.145  | 1.223  |
| m <sup>5</sup> U   | 0.686    | 1.362    | 0.952    | 0.918 | 0.732   | 0.891                           | 1.036 | 0.976 | 1.052  | 1.124 | 1.474  | 0.909  |
| Gm                 | 0.993    | 1.008    | 0.999    | 1.237 | 1.036   | 1.069                           | 1.519 | 1.072 | 1.264  | 1.121 | 1.047  | 1.091  |
| Um                 | 0.960    | 1.032    | 1.007    | 1.190 | 1.106   | 0.958                           | 1.290 | 1.052 | 1.265  | 1.275 | 1.572  | 1.412  |
| m <sup>5</sup> C   | 0.984    | 0.998    | 1.017    | 1.101 | 1.169   | 1.614                           | 1.172 | 1.031 | 1.074  | 1.206 | 1.360  | 1.391  |

|                                      |       |       |       |       |       |       |       |       |       |       |       |       |
|--------------------------------------|-------|-------|-------|-------|-------|-------|-------|-------|-------|-------|-------|-------|
| <b>m<sup>3</sup>C</b>                | 0.948 | 1.027 | 1.025 | 1.546 | 0.993 | 1.002 | 1.252 | 1.657 | 1.188 | 1.223 | 0.995 | 1.071 |
| <b>Cm</b>                            | 0.959 | 0.982 | 1.059 | 1.043 | 0.954 | 1.386 | 1.137 | 1.028 | 1.099 | 1.164 | 1.082 | 1.384 |
| <b>mcm<sup>5</sup>U</b>              | 0.914 | 1.034 | 1.052 | 1.204 | 1.093 | 1.061 | 1.224 | 1.217 | 1.132 | 1.200 | 1.039 | 1.130 |
| <b>m<sup>1</sup>G</b>                | 0.979 | 1.006 | 1.015 | 1.029 | 1.085 | 1.127 | 1.059 | 1.006 | 1.023 | 1.062 | 1.058 | 1.158 |
| <b>m<sup>2</sup>G</b>                | 0.990 | 1.012 | 0.998 | 1.080 | 1.048 | 1.141 | 1.167 | 1.046 | 1.086 | 1.138 | 1.063 | 1.114 |
| <b>ac<sup>4</sup>C</b>               | 0.972 | 1.015 | 1.013 | 1.072 | 1.044 | 1.351 | 1.133 | 0.985 | 1.026 | 1.184 | 1.163 | 1.166 |
| <b>t<sup>6</sup>A</b>                | 1.395 | 0.845 | 0.760 | 0.803 | 0.936 | 1.377 | 0.819 | 0.814 | 0.933 | 0.819 | 0.952 | 0.682 |
| <b>mcm<sup>5</sup>s<sup>2</sup>U</b> | 0.954 | 1.027 | 1.020 | 1.014 | 0.959 | 0.822 | 1.023 | 0.999 | 1.085 | 1.208 | 0.878 | 0.825 |
| <b>m<sup>7</sup>G</b>                | 0.896 | 1.027 | 1.077 | 1.454 | 0.888 | 1.084 | 1.189 | 1.720 | 1.141 | 1.635 | 0.987 | 1.082 |
| <b>m<sup>1</sup>I</b>                | 0.967 | 1.003 | 1.030 | 0.935 | 1.022 | 0.775 | 0.951 | 0.955 | 0.913 | 0.911 | 0.982 | 0.926 |
| <b>Am</b>                            | 1.095 | 0.979 | 0.926 | 0.977 | 1.017 | 0.941 | 1.380 | 0.992 | 1.640 | 1.550 | 1.612 | 0.926 |
| <b>m<sup>2</sup><sub>2</sub>G</b>    | 1.143 | 0.957 | 0.900 | 0.977 | 1.364 | 1.516 | 1.019 | 0.924 | 1.012 | 1.009 | 1.117 | 0.925 |
| <b>i6A</b>                           | 1.442 | 0.794 | 0.765 | 0.870 | 1.024 | 1.601 | 0.914 | 0.720 | 0.784 | 0.991 | 1.544 | 1.205 |
| <b>yW</b>                            | 1.056 | 1.038 | 0.906 | 0.764 | 1.103 | 1.268 | 0.622 | 0.644 | 0.604 | 0.599 | 1.158 | 1.088 |
| <b>m<sup>1</sup>A</b>                | 0.968 | 1.022 | 1.009 | 1.119 | 1.040 | 1.053 | 1.174 | 1.116 | 1.078 | 1.156 | 1.011 | 1.090 |

| Set 5                                |          |          |          |       |         |                                 |       |       |        |       |        |        |
|--------------------------------------|----------|----------|----------|-------|---------|---------------------------------|-------|-------|--------|-------|--------|--------|
| Ribonucleosides                      | Ctrl 5-1 | Ctrl 5-2 | Ctrl 5-3 | EMS 5 | γ-Rad 5 | H <sub>2</sub> O <sub>2</sub> 5 | IMS 5 | MMS 5 | MNNG 5 | NMU 5 | ONOO 5 | TBHP 5 |
| <b>D</b>                             | 1.156    | 0.948    | 0.896    | 0.994 | 0.946   | 1.065                           | 1.077 | 0.945 | 0.929  | 0.950 | 1.008  | 1.008  |
| <b>Y</b>                             | 1.171    | 0.939    | 0.890    | 1.005 | 0.993   | 1.160                           | 1.071 | 0.938 | 0.938  | 0.938 | 1.084  | 1.090  |
| <b>ncm<sup>5</sup>U</b>              | 0.992    | 0.995    | 1.013    | 1.018 | 1.056   | 1.377                           | 1.109 | 0.947 | 1.050  | 1.138 | 1.178  | 1.089  |
| <b>I</b>                             | 1.248    | 0.885    | 0.868    | 0.977 | 0.979   | 1.200                           | 1.078 | 0.897 | 1.028  | 1.049 | 1.159  | 1.094  |
| <b>m<sup>5</sup>U</b>                | 1.016    | 0.976    | 1.008    | 1.487 | 0.968   | 1.148                           | 1.144 | 1.044 | 1.044  | 1.095 | 0.975  | 1.056  |
| <b>Gm</b>                            | 1.102    | 0.953    | 0.945    | 1.108 | 0.960   | 0.969                           | 1.415 | 0.968 | 1.153  | 0.987 | 0.952  | 0.962  |
| <b>Um</b>                            | 0.868    | 0.998    | 1.134    | 1.083 | 0.945   | 0.902                           | 1.377 | 1.020 | 1.264  | 1.197 | 0.682  | 1.196  |
| <b>m<sup>5</sup>C</b>                | 1.117    | 0.934    | 0.948    | 1.028 | 1.081   | 1.474                           | 1.098 | 0.935 | 0.997  | 1.072 | 1.278  | 1.229  |
| <b>m<sup>3</sup>C</b>                | 1.115    | 0.946    | 0.939    | 1.358 | 0.956   | 1.025                           | 1.118 | 1.482 | 1.009  | 1.046 | 0.954  | 0.926  |
| <b>Cm</b>                            | 1.080    | 0.956    | 0.964    | 0.980 | 0.966   | 1.230                           | 1.049 | 0.949 | 0.969  | 1.004 | 0.999  | 1.248  |
| <b>mcm<sup>5</sup>U</b>              | 0.912    | 1.011    | 1.077    | 1.057 | 0.927   | 0.970                           | 1.152 | 1.130 | 1.221  | 1.107 | 0.857  | 0.932  |
| <b>m<sup>1</sup>G</b>                | 1.085    | 0.963    | 0.952    | 0.927 | 0.993   | 1.044                           | 0.963 | 0.901 | 0.881  | 0.901 | 0.989  | 0.999  |
| <b>m<sup>2</sup>G</b>                | 1.089    | 0.955    | 0.957    | 1.017 | 0.974   | 1.030                           | 1.079 | 0.989 | 1.023  | 1.036 | 0.968  | 0.992  |
| <b>ac<sup>4</sup>C</b>               | 1.092    | 0.955    | 0.953    | 0.912 | 0.941   | 0.895                           | 0.985 | 0.937 | 0.926  | 0.922 | 0.920  | 0.941  |
| <b>t<sup>6</sup>A</b>                | 1.101    | 0.944    | 0.955    | 0.811 | 0.982   | 0.827                           | 0.814 | 0.823 | 0.789  | 0.777 | 0.944  | 0.879  |
| <b>mcm<sup>5</sup>s<sup>2</sup>U</b> | 0.526    | 1.167    | 1.306    | 1.234 | 0.929   | 0.748                           | 1.245 | 1.112 | 1.406  | 1.309 | 0.846  | 1.035  |
| <b>m<sup>7</sup>G</b>                | 1.048    | 0.991    | 0.961    | 1.364 | 0.991   | 1.058                           | 1.058 | 1.479 | 0.949  | 1.368 | 0.987  | 1.016  |
| <b>m<sup>1</sup>I</b>                | 1.102    | 0.944    | 0.954    | 0.835 | 0.947   | 0.696                           | 0.851 | 0.820 | 0.806  | 0.799 | 0.921  | 0.803  |
| <b>Am</b>                            | 1.034    | 0.978    | 0.989    | 1.004 | 0.977   | 0.961                           | 1.451 | 1.002 | 1.638  | 1.593 | 1.557  | 0.959  |
| <b>m<sup>2</sup><sub>2</sub>G</b>    | 0.985    | 0.992    | 1.023    | 1.058 | 1.341   | 1.616                           | 1.105 | 1.003 | 1.105  | 1.136 | 1.140  | 1.112  |
| <b>i6A</b>                           | 0.946    | 1.001    | 1.053    | 1.097 | 1.109   | 1.695                           | 1.183 | 0.965 | 1.112  | 1.244 | 1.581  | 1.207  |
| <b>yW</b>                            | 1.102    | 0.932    | 0.965    | 0.662 | 1.046   | 1.121                           | 0.598 | 0.629 | 0.590  | 0.586 | 1.057  | 0.995  |
| <b>m<sup>1</sup>A</b>                | 0.894    | 1.071    | 1.035    | 1.005 | 1.075   | 1.016                           | 0.986 | 0.978 | 0.996  | 1.035 | 1.021  | 0.965  |



**Table S2.** Average fold-change values for toxicant-induced changes in tRNA modifications. Data in the table were derived by calculating the average value for the fold-change data in **Table S1** for each toxicant (LD<sub>80</sub> dose). Those data deemed to be significantly different from the average value for the unexposed controls (**Table S1**) by Student's t-test ( $p < 0.05$ ) are highlighted in yellow.

| Nucleoside                        | Oxidizing agents |               |                               |                   | Alkylating agents |       |       |       |       |
|-----------------------------------|------------------|---------------|-------------------------------|-------------------|-------------------|-------|-------|-------|-------|
|                                   | TBHP             | $\gamma$ -Rad | H <sub>2</sub> O <sub>2</sub> | ONOO <sup>-</sup> | MMS               | MNNG  | NMU   | IMS   | EMS   |
| D                                 | 1.030            | 1.021         | 1.069                         | 0.999             | 1.035             | 1.026 | 1.037 | 1.149 | 1.095 |
| Y                                 | 1.041            | 1.017         | 1.096                         | 1.042             | 1.007             | 1.029 | 1.008 | 1.122 | 1.066 |
| ncm <sup>5</sup> U                | 1.183            | 1.162         | 1.291                         | 1.159             | 0.947             | 1.004 | 1.090 | 1.062 | 1.067 |
| I                                 | 1.015            | 1.001         | 1.081                         | 1.039             | 0.989             | 1.005 | 1.039 | 1.110 | 0.996 |
| m <sup>5</sup> U                  | 1.018            | 0.961         | 1.019                         | 1.107             | 1.033             | 1.049 | 1.057 | 1.131 | 1.124 |
| Gm                                | 1.010            | 1.011         | 1.021                         | 0.981             | 1.055             | 1.252 | 1.059 | 1.588 | 1.120 |
| Um                                | 1.159            | 1.055         | 0.905                         | 1.305             | 0.937             | 1.122 | 1.154 | 1.240 | 1.008 |
| m <sup>5</sup> C                  | 1.273            | 1.214         | 1.409                         | 1.289             | 1.002             | 1.021 | 1.063 | 1.116 | 1.049 |
| m <sup>3</sup> C                  | 1.012            | 1.010         | 1.022                         | 0.987             | 1.582             | 1.129 | 1.152 | 1.247 | 1.593 |
| Cm                                | 1.263            | 0.983         | 1.229                         | 0.989             | 0.984             | 0.981 | 1.014 | 1.095 | 0.947 |
| mcm <sup>5</sup> U                | 1.079            | 1.082         | 1.101                         | 1.022             | 1.157             | 1.176 | 1.207 | 1.185 | 1.224 |
| m <sup>1</sup> G                  | 1.031            | 1.036         | 1.042                         | 0.987             | 1.007             | 0.975 | 0.994 | 1.071 | 0.969 |
| m <sup>2</sup> G                  | 1.028            | 1.027         | 1.049                         | 0.980             | 1.081             | 1.091 | 1.116 | 1.191 | 1.015 |
| ac <sup>4</sup> C                 | 1.012            | 1.020         | 1.051                         | 1.039             | 0.981             | 0.979 | 1.016 | 1.082 | 1.072 |
| t <sup>6</sup> A                  | 0.929            | 1.000         | 1.374                         | 0.975             | 1.005             | 0.992 | 0.995 | 1.051 | 0.971 |
| mcm <sup>5</sup> s <sup>2</sup> U | 1.055            | 1.029         | 1.080                         | 1.032             | 1.173             | 1.208 | 1.135 | 1.283 | 1.134 |
| m <sup>7</sup> G                  | 1.020            | 0.993         | 1.038                         | 0.986             | 1.649             | 1.036 | 1.452 | 1.149 | 1.395 |
| m <sup>1</sup> I                  | 0.860            | 0.977         | 0.750                         | 0.945             | 0.876             | 0.825 | 0.860 | 0.901 | 0.822 |
| Am                                | 0.977            | 1.019         | 0.980                         | 1.543             | 1.027             | 1.629 | 1.604 | 1.533 | 1.026 |
| m <sup>2</sup> <sub>2</sub> G     | 1.021            | 1.416         | 1.556                         | 1.038             | 1.030             | 1.074 | 1.084 | 1.149 | 1.000 |
| i6A                               | 1.140            | 1.133         | 1.357                         | 1.287             | 0.988             | 1.007 | 1.097 | 1.172 | 1.162 |
| yW                                | 0.901            | 0.979         | 1.037                         | 1.176             | 0.555             | 0.776 | 0.738 | 0.766 | 0.748 |
| m <sup>1</sup> A                  | 1.022            | 1.060         | 1.040                         | 1.017             | 1.062             | 1.060 | 1.085 | 1.144 | 1.085 |

**Table S3:** MMS treatment induces up- or down-regulation of 694 of 2381 proteins independent of changes in mRNA levels. *PROVIDED AS A SEPARATE EXCEL DOCUMENT.*

**Table S4:** Proteins with threonine content >10% are membrane- and cell wall-related proteins.

| <i>Membrane and cell wall proteins</i> |               |       |       |                                                                                         |
|----------------------------------------|---------------|-------|-------|-----------------------------------------------------------------------------------------|
| Gene                                   | # Amino acids | # Thr | % Thr | Gene function                                                                           |
| SED1                                   | 339           | 99    | 29.2  | Cell wall protein SED1                                                                  |
| FLO1                                   | 1538          | 432   | 28.1  | Flocculation protein FLO1                                                               |
| FLO9                                   | 1323          | 356   | 26.9  | Flocculation protein FLO9                                                               |
| DAN4                                   | 1162          | 312   | 26.9  | Cell wall protein DAN4                                                                  |
| SVS1                                   | 261           | 65    | 24.9  | Protein SVS1 (VO <sub>4</sub> <sup>-3</sup> resistance, cell wall protein) <sup>2</sup> |
| MUC1                                   | 1368          | 338   | 24.7  | Flocculation protein FLO11                                                              |
| FLO5                                   | 1076          | 257   | 23.9  | Flocculation protein FLO5                                                               |
| SRL1                                   | 211           | 49    | 23.2  | Cell wall protein SRL1                                                                  |
| AGA1                                   | 726           | 156   | 21.5  | A-agglutinin cell wall anchorage subunit                                                |
| FIT3                                   | 205           | 44    | 21.5  | Facilitator of iron transport 3 (outer cell wall)                                       |
| WSC4                                   | 606           | 125   | 20.6  | Cell wall integrity and stress response component 4                                     |
| FIT2                                   | 154           | 30    | 19.5  | Facilitator of iron transport 2 (outer cell wall)                                       |
| FIT1                                   | 529           | 103   | 19.5  | Facilitator of iron transport 1 (outer cell wall)                                       |
| CCW12                                  | 134           | 26    | 19.4  | Covalently-linked cell wall protein 12                                                  |
| PRY3                                   | 882           | 160   | 18.1  | Cell wall protein PRY3                                                                  |
| FIG2                                   | 1610          | 291   | 18.1  | Factor-induced gene 2 protein (cell wall integrity)                                     |
| HSP150                                 | 388           | 65    | 16.8  | Cell wall mannoprotein HSP150                                                           |
| FLO10                                  | 1170          | 194   | 16.6  | Flocculation protein FLO10                                                              |
| DSE2                                   | 326           | 54    | 16.6  | Protein DSE2 (GPI-anchored cell wall protein)                                           |
| SPI1                                   | 149           | 24    | 16.1  | Uncharacterized cell wall protein SPI1                                                  |
| KRE9                                   | 277           | 42    | 15.2  | Cell wall synthesis protein KRE9                                                        |
| SCW11                                  | 543           | 80    | 14.7  | Cell wall glycanase SCW11 <sup>3</sup>                                                  |
| WSC3                                   | 557           | 82    | 14.7  | Cell wall integrity and stress response component 3                                     |
| PIR1                                   | 342           | 50    | 14.6  | Cell wall mannoprotein PIR1                                                             |
| CTS1                                   | 563           | 81    | 14.4  | Endochitinase (outer cell wall)                                                         |
| COX14                                  | 71            | 10    | 14.1  | Cytochrome c oxidase assembly protein COX14 (mitochondrial membrane)                    |
| DAN1                                   | 299           | 41    | 13.7  | Cell wall protein DAN1                                                                  |
| SAG1                                   | 651           | 89    | 13.7  | Alpha-agglutinin (cell surface glycoprotein)                                            |
| KNH1                                   | 269           | 36    | 13.4  | Cell wall synthesis protein KNH1                                                        |
| PRM7                                   | 116           | 15    | 12.9  | Pheromone-regulated protein PRM7 (membrane protein)                                     |
| AGA2                                   | 88            | 11    | 12.5  | A-agglutinin-binding subunit                                                            |
| SOM1                                   | 75            | 9     | 12    | Protein SOM1 (mitochondrial inner membrane)                                             |
| CRH1                                   | 508           | 60    | 11.8  | Probable glycosidase CRH1 (GPI-anchored cell wall protein)                              |
| HKR1                                   | 1803          | 213   | 11.8  | Signaling mucin HKR1 (plasma membrane)                                                  |
| SLG1                                   | 379           | 44    | 11.6  | Protein SLG1 (cell membrane, stress response signaling)                                 |
| PAU6                                   | 121           | 14    | 11.6  | Seripauperin-6 (stress response, endoplasmic reticulum)                                 |
| ECM19                                  | 113           | 13    | 11.5  | Protein ECM19 (mitochondrial membrane)                                                  |
| SUN4                                   | 421           | 48    | 11.4  | Septation protein SUN4 (cell wall septation)                                            |
| ERG28                                  | 149           | 17    | 11.4  | Ergosterol biosynthetic protein 28 (endoplasmic reticulum scaffold protein)             |
| NUP42                                  | 431           | 49    | 11.4  | Nucleoporin NUP42                                                                       |
| MKC7                                   | 597           | 67    | 11.2  | Aspartic proteinase MKC7 (GPI-anchored cell wall protein)                               |
| ATP15                                  | 63            | 7     | 11.1  | ATP synthase subunit epsilon, mitochondrial membrane                                    |

|        |      |     |      |                                                                     |
|--------|------|-----|------|---------------------------------------------------------------------|
| CIS3   | 228  | 25  | 11   | Cell wall mannoprotein CIS3                                         |
| NUP1   | 1077 | 118 | 11   | Nucleoporin NUP1                                                    |
| YPS1   | 570  | 62  | 10.9 | Aspartic proteinase 3 (GPI-anchored plasma memb. protein)           |
| DAN3   | 121  | 13  | 10.7 | Cell wall protein DAN3                                              |
| TIR4   | 488  | 52  | 10.7 | Cell wall protein TIR4                                              |
| SPS100 | 327  | 35  | 10.7 | Sporulation-specific wall maturation protein                        |
| PAU1   | 121  | 13  | 10.7 | Seripauperin-1/14 (stress response, endoplasmic reticulum)          |
| PAU4   | 121  | 13  | 10.7 | Seripauperin-4 (stress response, endoplasmic reticulum)             |
| QRI5   | 112  | 12  | 10.7 | Mitochondrial mRNA-processing protein COX24 (inner membrane)        |
| NUP57  | 542  | 58  | 10.7 | Nucleoporin NUP57                                                   |
| PAU2   | 121  | 13  | 10.7 | Seripauperin-2 (stress response, endoplasmic reticulum)             |
| DAN2   | 125  | 13  | 10.4 | Cell wall protein DAN2                                              |
| STE2   | 432  | 45  | 10.4 | Pheromone alpha factor receptor                                     |
| PAU3   | 125  | 13  | 10.4 | Seripauperin-3 (stress response, endoplasmic reticulum)             |
| SCW10  | 390  | 40  | 10.3 | Probable family 17 glucosidase SCW10 (cell wall glycanase)          |
| MFA2   | 39   | 4   | 10.3 | Mating hormone A-factor 2 (cell membrane protein)                   |
| YPS3   | 509  | 52  | 10.2 | Aspartic proteinase yapsin-3 (GPI-anchored plasma membrane protein) |
| PRM2   | 657  | 67  | 10.2 | Pheromone-regulated membrane protein 3                              |
| UTR2   | 468  | 47  | 10   | Probable glycosidase CRH2 (GPI-anchored cell wall protein)          |

**Proteins with threonine content >10%, but not related to the membrane or cell wall**

| Gene   | # Amino acids | # Thr | % Thr | Gene function                                          |
|--------|---------------|-------|-------|--------------------------------------------------------|
| DDR48  | 395           | 105   | 26.6  | Stress protein DDR48                                   |
| BSC1   | 329           | 76    | 23.1  | Bypass of stop codon protein 1                         |
| ARG80  | 178           | 24    | 13.5  | Arginine metabolism regulation protein I               |
| RPA14  | 138           | 18    | 13.0  | DNA-directed RNA polymerase I subunit RPA14            |
| MSB2   | 1307          | 165   | 12.6  | Protein MSB2                                           |
| MRPL49 | 162           | 20    | 12.3  | 54S ribosomal protein L49, mitochondrial               |
| RPS27A | 83            | 10    | 12.0  | 40S ribosomal protein S27-A                            |
| RPS27B | 83            | 10    | 12.0  | 40S ribosomal protein S27-B                            |
| YPS5   | 166           | 20    | 12.0  | Putative uncharacterized protein YGL259W               |
| PBP4   | 186           | 22    | 11.8  | Protein PBP4 (cytoplasmic stress granule)              |
| ABM1   | 124           | 14    | 11.3  | Aberrant microtubules protein 1                        |
| RNH203 | 111           | 12    | 10.8  | Ribonuclease H2 subunit C                              |
| WHI5   | 296           | 32    | 10.8  | G1-specific transcriptional repressor WHI5             |
| RPL22A | 122           | 13    | 10.7  | 60S ribosomal protein L22-A                            |
| SRB6   | 122           | 13    | 10.7  | Mediator of RNA polymerase II transcription subunit 22 |
| BAR1   | 588           | 62    | 10.5  | Barrierpepsin                                          |
| CTK3   | 297           | 31    | 10.4  | CTD kinase subunit gamma                               |
| MED8   | 224           | 23    | 10.3  | Mediator of RNA polymerase II transcription subunit 8  |
| TAF14  | 245           | 25    | 10.2  | Transcription initiation factor TFIID subunit 14       |
| MED6   | 296           | 30    | 10.1  | Mediator of RNA polymerase II transcription subunit 6  |
| RPL37B | 89            | 9     | 10.1  | 60S ribosomal protein L37-B                            |
| TUP1   | 714           | 72    | 10.1  | General transcriptional corepressor TUP1               |
| NRM1   | 250           | 25    | 10.0  | Transcription factor NRM1                              |

## SUPPORTING REFERENCES

- (1) Chan, C. T., Dyavaiah, M., DeMott, M. S., Taghizadeh, K., Dedon, P. C., and Begley, T. J. (2010) A quantitative systems approach reveals dynamic control of tRNA modifications during cellular stress. *PLoS Genetics* 6, e1001247.
- (2) Terashima, H., Fukuchi, S., Nakai, K., Arisawa, M., Hamada, K., Yabuki, N., and Kitada, K. (2002) Sequence-based approach for identification of cell wall proteins in *saccharomyces cerevisiae*. *Curr. Genetics* 40, 311-316.
- (3) Cappellaro, C., Mrsa, V., and Tanner, W. (1998) New potential cell wall glucanases of *saccharomyces cerevisiae* and their involvement in mating. *J. Bacteriol.* 180, 5030-5037.
